# Supplementary material
Source: PubMed Central journal article supplement (PMC6092021)
Supplement: NIHMS965501-supplement-1.pdf [file NIHMS965501-supplement-1.pdf]

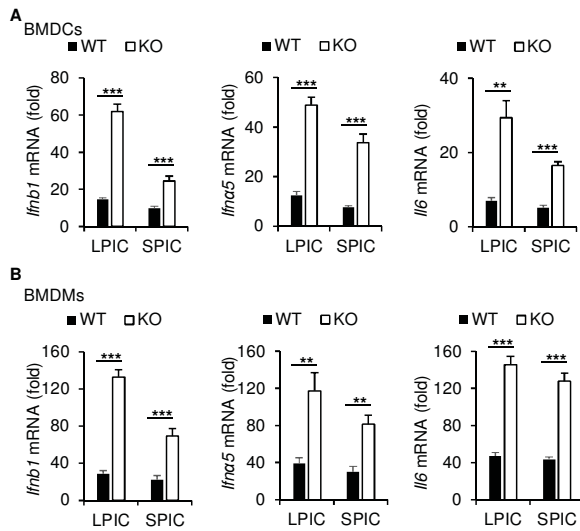

**Supplemental Figure 1. Knockout of TRIM29 enhanced the mRNA production of type I IFN and IL-6 in BMDCs and BMDMs in response to poly I:C**

(A, B) Quantitative RT-PCR of IFN- $\beta$ 1, IFN- $\alpha$ 5 and IL-6 in BMDCs (A) or BMDMs (B) from wildtype (TRIM29<sup>+/+</sup>) and *Trim29*-knockout (TRIM29<sup>-/-</sup>) mice after 6 h of stimulation with long poly I:C (LPIC, 20  $\mu$ g/ml) or short poly I:C (SPIC, 20  $\mu$ g/ml) delivered by Lipofectamine 3000. Mock, cells without stimulation. \* $P$ <0.05, \*\* $P$ <0.01 and \*\*\* $P$ <0.001 (unpaired  $t$  test). Data are representative of three independent experiments with similar results (mean + s.d.).

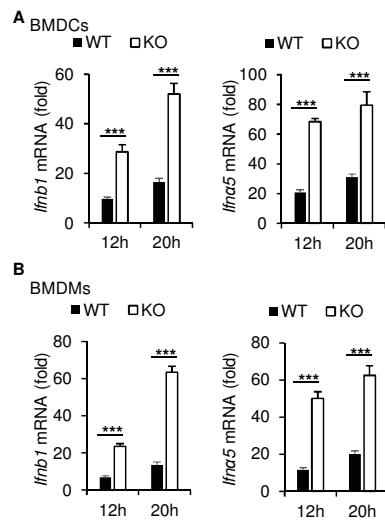

**Supplemental Figure 2. TRIM29 negatively regulates type I IFN production in mRNA level in BMDCs and BMDMs upon RNA virus infection**

(A, B) Quantitative RT-PCR of IFN-β1 and IFN-α5 in BMDCs (A) or BMDMs (B) from wildtype (TRIM29<sup>+/+</sup>) and *Trim29*-knockout (TRIM29<sup>-/-</sup>) mice mock infected or infected with reovirus at a multiplicity of infection (MOI) of 5 for 12h or 20h. Mock, cells without infection. \**P*<0.05, \*\**P*<0.01 and \*\*\**P*<0.001 (unpaired *t* test). Data are representative of three independent experiments with similar results (mean + s.d.).
